# Supplementary material
Source: publisher site journal article supplement (https://www.dovepress.com/article/425463)
Supplement: Supplementary file 1 [file get_supplementary_file.php]

Table S1 Antifungal regimens and duration of antifungal therapy in patients with central nervous system cryptococcosis.

| Patients | Therapeutic regimen | Duration*（weeks） | sampling time**(weeks) |
| --- | --- | --- | --- |
| No. 1 | amphotericin B+ flucytosine | 7 |  |
|  | fluconazole | 37 | 44 |
| No. 2 | amphotericin B+ flucytosine | 4 |  |
|  | voriconazole | 26 | 30 |
| No.3 | amphotericin B+ flucytosine | 2 |  |
|  | fluconazole | 37 | 39 |
| No.4 | fluconazole | 21 | 21 |
| No.5 | amphotericin B+ flucytosine | 6 |  |
|  | voriconazole | 6 | 12 |
| No.6 | amphotericin B+ flucytosine | 4 |  |
|  | fluconazole | 17 | 21 |
| No.7 | amphotericin B+ flucytosine | 4 |  |
|  | voriconazole | 1 | 5 |
| No.8 | fluconazole | 9 | 9 |
| No.9 | Amphotericin B+ fluconazole | 4 | 4 |
| No.10 | amphotericin B+ flucytosine | 4 |  |
|  | fluconazole | 2 | 6 |

* The duration of antifungal therapy to sampling

** Totle time from antifungal treatment to sampling
